# Supplementary material for: Predicting lymph node metastasis from primary tumor histology and clinicopathologic factors in colorectal cancer using deep learning
Source: PubMed Central journal article supplement (PMC10125969; doi:10.1038/s43856-023-00282-0), 2023-04-24
Supplement: 43856_2023_282_MOESM5_ESM.pdf [file 43856_2023_282_MOESM5_ESM.pdf]

## **Description of Additional Supplementary Files**

**File Name:** Supplementary Data 1

**Description:** Patient demographics

**File Name:** Supplementary Data 2

**Description:** Source data for Figure 3
